# Supplementary material for: Associations between malaria and local and global climate variability in five regions in Papua New Guinea
Source: PubMed Central journal article supplement (PMC4972963; doi:10.1186/s41182-016-0021-x), 2016-08-04

**SUPPLEMENTAL MATERIALS: Associations between malaria and local and global climate variability in five regions in Papua New Guinea**

**Chisato Imai, Hae-Kwan Cheong, Ho Kim, Yasushi Honda, Jin-Hee Eum, Clara T. Kim, Jin Seob Kim, Yoonhee Kim, Swadhin K. Behera, Mohd Nasir Hassan, Joshua Nealon, Hyenmi Chung, and Masahiro Hashizume**

**Table S1:** The periods of time for the respective local weather and global climate models for each study locations.

| Region                   | Local weather |      |       | (missing data)      |               | Global climate |      |       |
|--------------------------|---------------|------|-------|---------------------|---------------|----------------|------|-------|
|                          | start         | end  | years | Minimum temperature | Precipitation | start          | end  | years |
| <b>East Sepik</b>        | 1997          | 2008 | 12    | 1.4%                | 0.7%          | 1997           | 2008 | 12    |
| <b>Madang</b>            | 1997          | 2006 | 10    | 0.0%                | 0.0%          | 1997           | 2008 | 12    |
| <b>Eastern Highlands</b> | 1999          | 2008 | 10    | 13.3%               | 11.7%         | 1997           | 2008 | 12    |
| <b>Western</b>           | 1998          | 2007 | 10    | 0.8%                | 4.2%          | 1998           | 2008 | 11    |
| <b>Port Moresby</b>      | 1997          | 2007 | 11    | 0.8%                | 0.0%          | 1997           | 2008 | 12    |

**Table S2:** The crude Pearson's correlations among malaria cases and local weather factors during the study period at each study location.

| Region                   | Malaria       | Malaria             | Precipitation       |
|--------------------------|---------------|---------------------|---------------------|
|                          | Precipitation | Minimum temperature | Minimum temperature |
| <b>East Sepik</b>        | 0.06          | 0.27                | 0.02                |
| <b>Madang</b>            | 0.24          | 0.10                | 0.01                |
| <b>Eastern Highlands</b> | 0.01          | 0.28                | 0.50                |
| <b>Western</b>           | 0.30          | 0.05                | 0.25                |
| <b>Port Moresby</b>      | 0.21          | 0.15                | 0.23                |

**Figure S1:** Cross-correlations for malaria cases and local weather factors. Cross-correlations identify the lagged relationships. The correlograms shows the correlations between malaria cases at time  $t$  and local weather at lag time  $t + k$  (i.e.  $k$  is a lag).

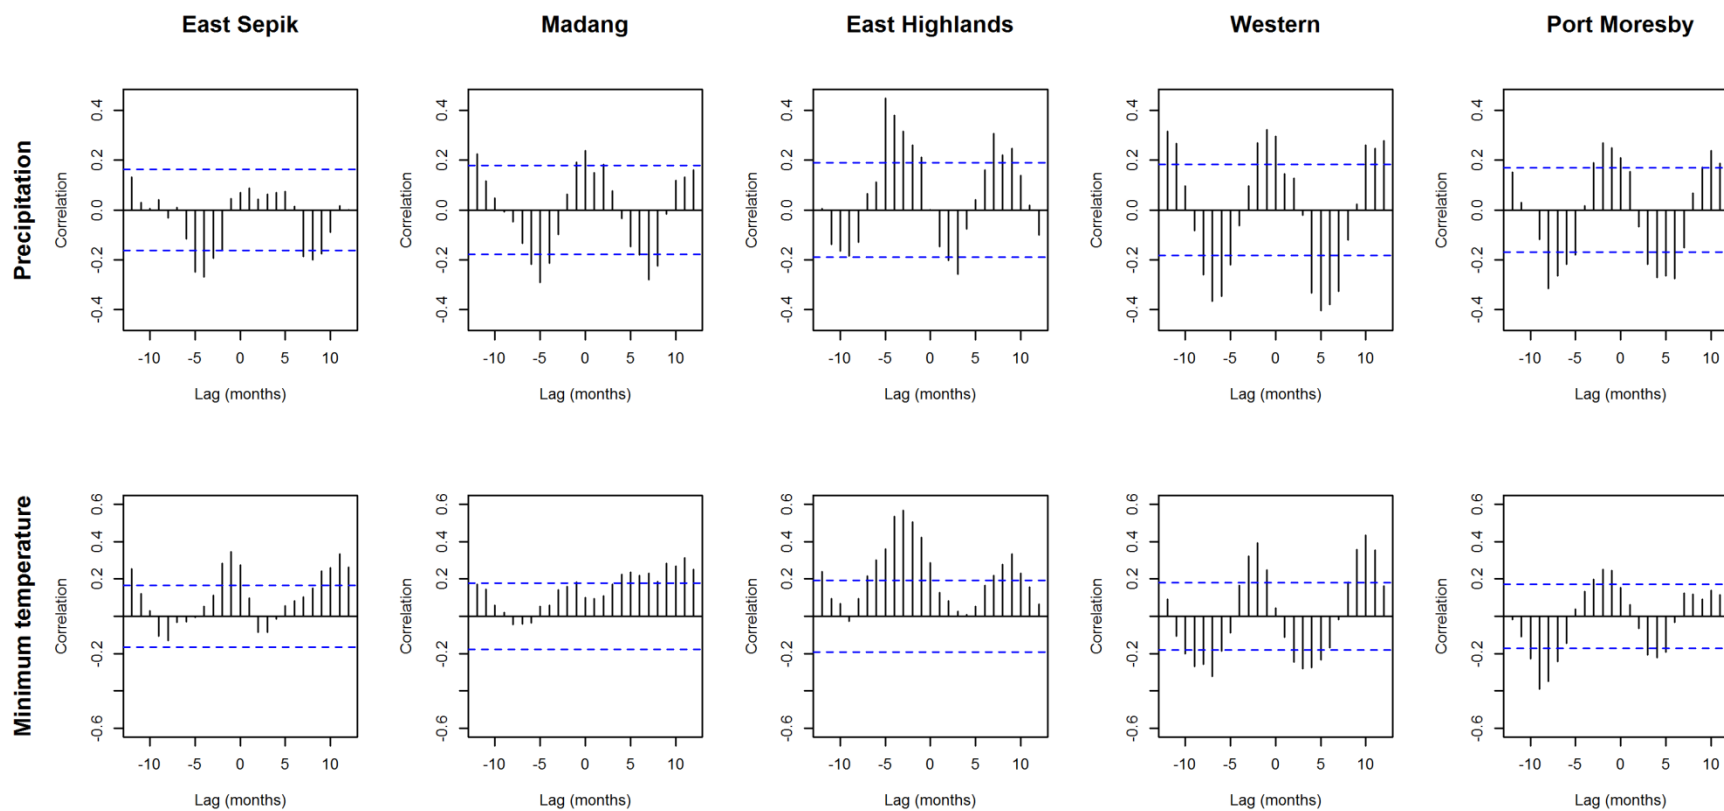

**Figure S2:** Cross-correlations for malaria cases and global climate factors. The associations between malaria cases at time  $t$  and global climate indices at time  $t + k$  (i.e. lag).

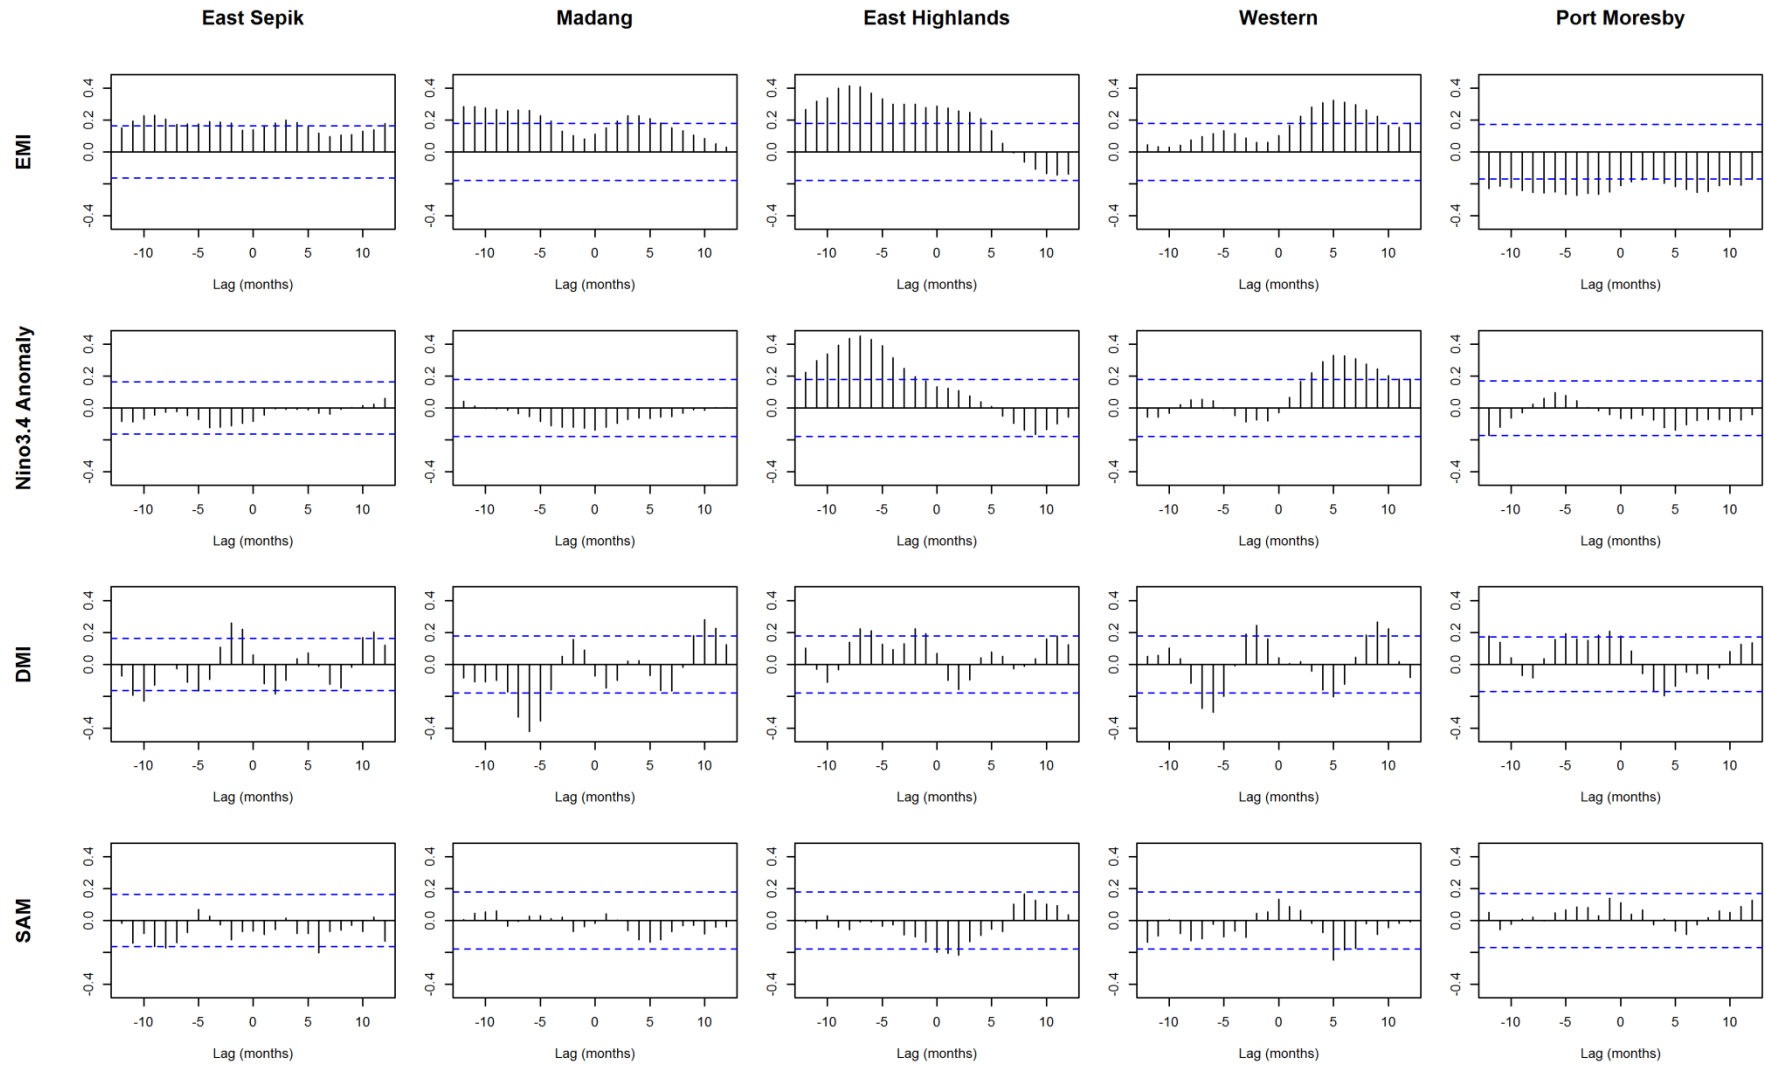

**Figure S3:** Time series plots for malaria cases, precipitation, and minimum temperature in each region during the study period.

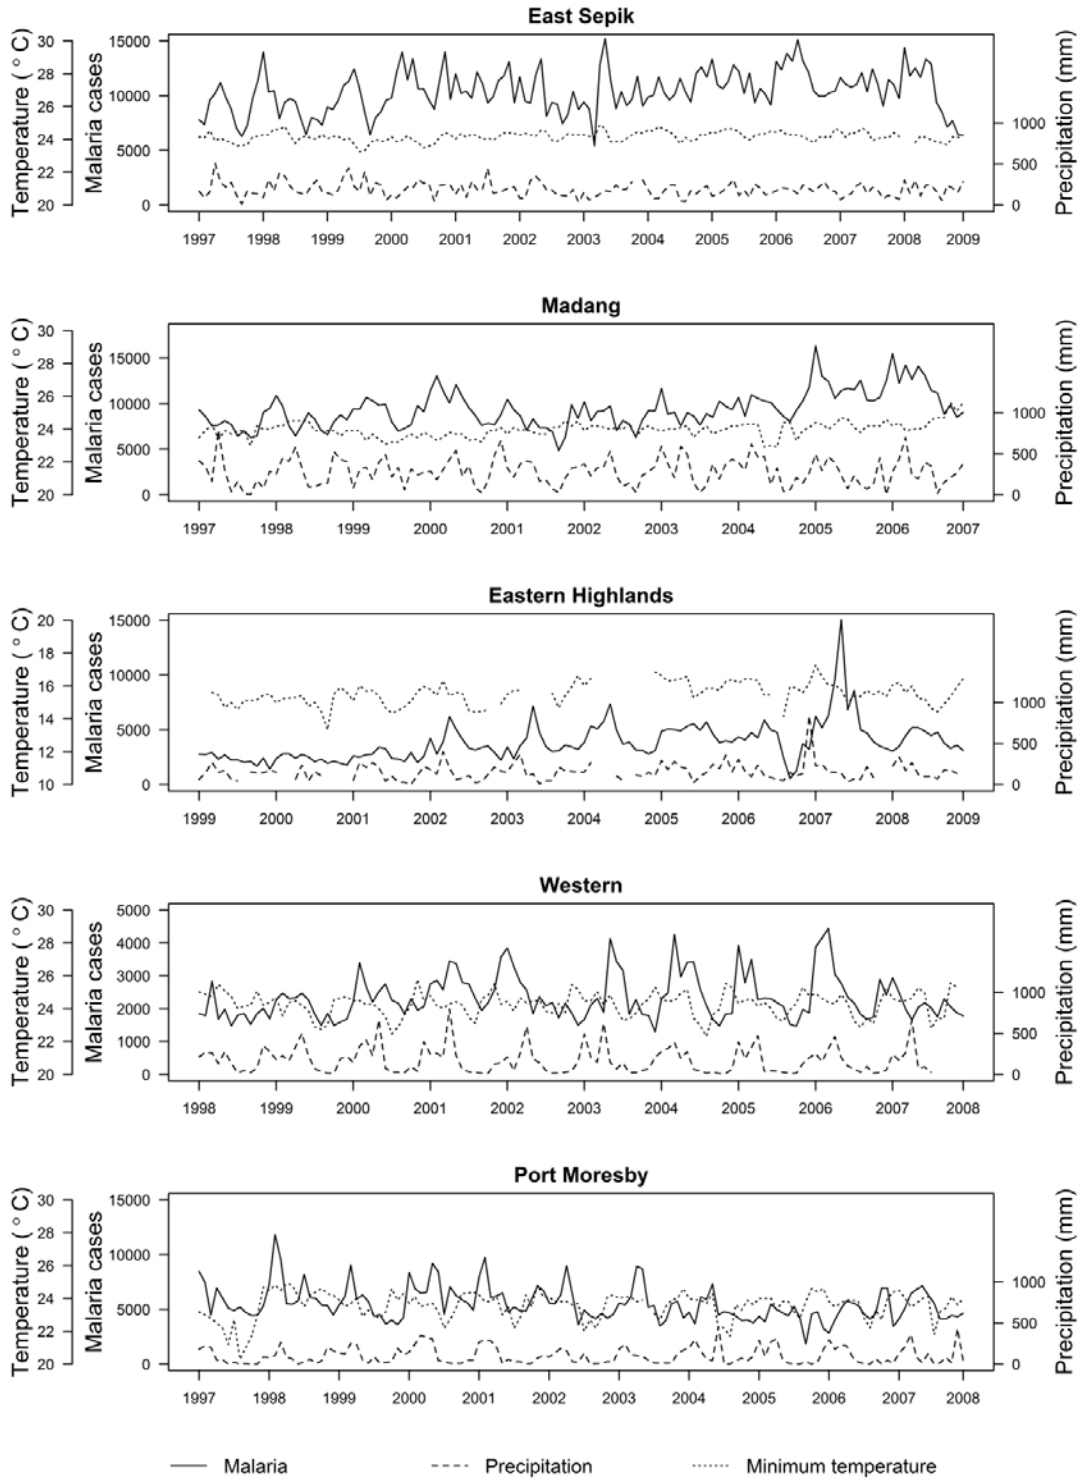

**Figure S4:** Correlation, histogram, and plot matrix for EMII, NINO3.4 Anomaly, DMI and SAM during 1997 – 2008.

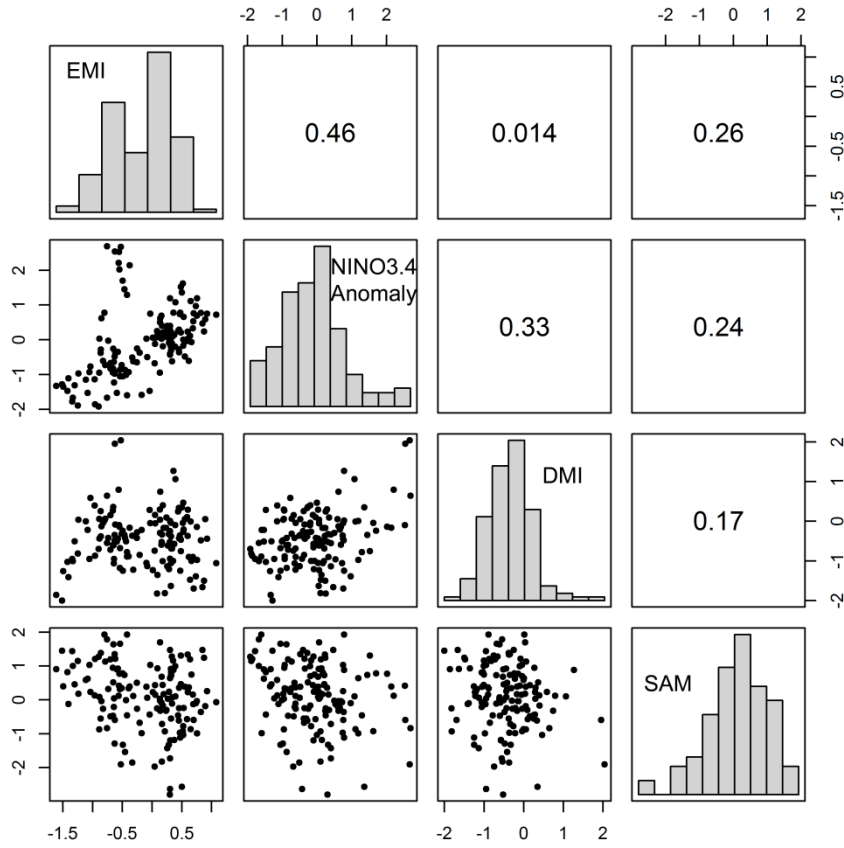

Supplement: 41182_2016_21_MOESM1_ESM.pdf [file 41182_2016_21_MOESM1_ESM.pdf]
